# Supplementary material for: Novel Fe/Ca oxide co-embedded coconut shell biochar for phosphorus recovery from agricultural return flows
Source: Royal Society of Chemistry journal article supplement (doi:10.1039/d4ra04795h), 2024-01-01
Supplement: d4ra04795h1.pdf [file d4ra04795h1.pdf]

1 **Novel Fe/Ca oxide co-embedded coconut shell biochar for**  
2 **phosphorus recovery from agricultural return flows**

3 **Anqi Hu <sup>a,c†</sup>, Yongcan Jiang <sup>a,b† \*</sup>, Jiaqi An <sup>c</sup>, Xiaodian Huang <sup>a</sup>, Abdelbaky**  
4 **Hossam Elgarhy <sup>c,d</sup>, Huafen Cao <sup>c</sup>, Guanglong Liu <sup>c \*</sup>**

5  
6 **Affiliation**

7 <sup>a</sup> PowerChina Huadong Engineering Corporation Ltd., Hangzhou 311122,  
8 Zhejiang Province, China;

9 <sup>b</sup> Institute of Soil and Water Resources and Environmental Science, College of  
10 Environmental and Resource Sciences, Zhejiang University, Hangzhou 310058,  
11 Zhejiang Province, China;

12 <sup>c</sup> State Environmental Protection Key Laboratory of Soil Health and Green  
13 Remediation, College of Resources and Environment, Huazhong Agricultural  
14 University, Wuhan 430070, China;

15 <sup>d</sup> Central Laboratory for Environmental Quality Monitoring (CLEQM), National  
16 Water Research Center (NWRC), Qalyobia, 13621, Egypt.

17

18 \*Corresponding author:

19 Prof. Guanglong Liu. E-mail: liugl@mail.hzau.edu.cn

20 † Contributed equally to this work.

21

## 22 **Text S1**

23 The phosphate removal efficiency (%) and adsorption capacity ( $Q_e$ ) of the  
24 modified biochar were calculated using Eq. (1) and Eq. (2).

$$25 \quad \text{Removal efficiency} = \left( \frac{C_0 - C_e}{C_0} \right) \times 100\% \quad (1)$$

$$26 \quad Q_e = \frac{C_0 - C_e}{m} V \quad (2)$$

27 where  $C_0$  and  $C_e$  (mg/L) represent the initial and final phosphate concentrations,  
28 respectively;  $V$  (L) stands for the volume of the solution;  $m$  (g) denotes the mass of  
29 the biochar.

## 30 **Effect of dosage and pH on phosphorus adsorption**

31 Adsorption experiments were conducted to compare the phosphorus adsorption  
32 at various dosages to determine the optimum dosage. The dosages were set as 0.1, 0.5,  
33 1, 1.5, 2, 4, 6, and 8 g/L, and the above dosages of FCBC and BC were mixed with  
34 250 mL of  $\text{KH}_2\text{PO}_4$  solution (50 mg/L, pH = 8), respectively. To investigate how pH  
35 impacts the adsorption of phosphorus by FCBC, 0.5 g of FCBC was mixed with 250  
36 mL of  $\text{KH}_2\text{PO}_4$  solution (50 mg/L). The solution's pH was set to 2, 4, 6, 8, 10, and 12,  
37 respectively. The content of remaining phosphorus and pH in the solution were  
38 measured by oscillating at 20°C for 12 h.

## 39 **Adsorption isotherm and kinetics experiments**

40 The adsorption isotherms were investigated by combining 0.5 g of FCBC with  
41 250 mL of  $\text{KH}_2\text{PO}_4$  solution at different concentrations (5 - 500 mg/L). The  
42 experimental data was simulated using two models: the Langmuir model (Eq. 3) and

43 the Freundlich model (Eq. 4).

$$44 \quad Q_e = \frac{K_L Q_m C_e}{1 + K_L C_e} \quad (3)$$

$$45 \quad Q_e = K_F C_e^{\frac{1}{n}} \quad (4)$$

46 where  $Q_e$  (mg/g) stands for the quantity of phosphate adsorbed at the equilibrium  
47 concentration of the phosphate solution ( $C_e$ , mg/L);  $K_L$  (L/mg) and  $K_F$  ( $\text{mg}^{1-1/n} \cdot \text{g}^{-1} \cdot \text{L}^{1/n}$ )  
48 represent the Langmuir and Freundlich constants, respectively;  $Q_m$  (mg/g) denotes the  
49 maximum adsorption capacity;  $1/n$  is an empirical constant for the Freundlich model.

50 The adsorption kinetics at different contact times from 0 to 24 h were  
51 investigated by combining 0.5 g of FCBC and 250 mL of  $\text{KH}_2\text{PO}_4$  solution (50 mg/L,  
52 pH = 8). The adsorption mechanism of FCBC on phosphate was determined using the  
53 pseudo-first-order (Eq. 5), pseudo-second-order (Eq. 6), and intra-particle diffusion  
54 models (Eq. 7).<sup>1</sup>

$$55 \quad Q_t = Q_e(1 - \exp(-k_1 t)) \quad (5)$$

$$56 \quad Q_t = \frac{k_2 Q_e^2 t}{1 + k_2 Q_e t} \quad (6)$$

$$57 \quad Q_t = k_i t^{0.5} + C \quad (7)$$

58 where  $k_1$  and  $k_2$  represent the rate constants for the pseudo-first-order and pseudo-  
59 second-order models, respectively;  $k_i$  and  $C$  are the intra-particle diffusion rate  
60 constant and intercept, respectively;  $Q_t$  (mg/g) denotes the quantity of phosphate  
61 adsorbed at time  $t$ , and  $Q_e$  (mg/g) is the quantity of phosphate adsorbed at equilibrium.

## 62 **Effect of coexisting anions**

63 To investigate the impact of common coexisting anions on phosphorus

64 elimination by biochar, varying quantities of  $\text{Na}_2\text{CO}_3$ ,  $\text{NaNO}_3$ ,  $\text{Na}_2\text{SO}_4$ ,  $\text{NaHCO}_3$ ,  
65  $\text{NaF}$ , and  $\text{NaCl}$  were introduced into a 250 mL  $\text{KH}_2\text{PO}_4$  solution (50 mg/L). This  
66 resulted in coexisting anion concentrations of 100, 500, and 1000 mg/L in the  
67 prepared solution. Then, 0.5 g of FCBC was weighed and mixed with a  $\text{KH}_2\text{PO}_4$   
68 solution containing coexisting anions.

### 69 **Adsorption of phosphorus from natural waters**

70 To further examine the adsorption effect of FCBC and BC on phosphorus in  
71 natural water bodies, samples of farmland tailwater, ditch water, and pond water were  
72 collected from agricultural surface sources in the test field area of Keyuan Road,  
73 Wuhan City, Hubei Province, China, on October 11, 2023. The reactor was loaded  
74 with 0.5 g of FCBC and BC, and then 250 mL of farmland tailwater, ditch water, and  
75 pond water were added respectively.

76

**Table S1** Surface area and pore structure of BC and FCBC

|      | $S_{\text{BET}}$ (m <sup>2</sup> /g) | Pore volume (cm <sup>3</sup> /g) | Pore size (nm) |
|------|--------------------------------------|----------------------------------|----------------|
| BC   | 291.2934                             | 0.218585                         | 4.2745         |
| FCBC | 441.5189                             | 0.263961                         | 3.3788         |

77

78

**Table S2** Parameters for adsorption kinetics of P on FCBC

| Models                  | Parameter 1     | Parameter 2        | R <sup>2</sup> |
|-------------------------|-----------------|--------------------|----------------|
| Pseudo-first-order      | $k_1=0.0049$    | $Q_e=18.1213$ mg/L | $R^2=0.9844$   |
| Pseudo-second-order     | $k_2=0.0002$    | $Q_e=22.2797$ mg/L | $R^2=0.9939$   |
| Intraparticle diffusion | $k_{i1}=0.8783$ | $C_1=-1.0271$      | $R^2=0.9961$   |
|                         | $k_{i2}=0.6253$ | $C_2=2.4845$       | $R^2=0.9921$   |
|                         | $k_{i3}=0.0701$ | $C_3=16.4141$      | $R^2=0.9911$   |

**Table S3** Parameters for adsorption isotherm of P on FCBC

| Models     | Parameter 1                                                              | Parameter 2                | R <sup>2</sup> |
|------------|--------------------------------------------------------------------------|----------------------------|----------------|
| Langmuir   | $K_L=0.01623 \text{ L/mg}$                                               | $Q_m=53.3131 \text{ mg/g}$ | $R^2=0.9982$   |
| Freundlich | $K_F=4.1684 \text{ mg}^{1-1/n} \cdot \text{g}^{-1} \cdot \text{L}^{1/n}$ | $1/n=0.4168$               | $R^2=0.9631$   |

83 **Table S4** Comparison of the maximum adsorption capacity of different biochar  
 84 adsorbents for P

| Adsorbant                                                                                                     | Isotherm | Kinetics | Q <sub>max</sub> (mg/g) | References |
|---------------------------------------------------------------------------------------------------------------|----------|----------|-------------------------|------------|
| MgO-modified biochar                                                                                          | F        | S        | 18.98                   | 2          |
| Palm waste biochar                                                                                            | L        | S        | 26.90                   | 3          |
| Lime sludge modified<br>biochar                                                                               | R-P      | S        | 15                      | 4          |
| Hydrocotyle vulgaris<br>derived novel biochar<br>beads                                                        | L        | S        | 20.32                   | 5          |
| Fe/Mg-Biochar<br>Nanocomposites                                                                               | L-F      | S        | 6.95                    | 6          |
| Lanthanum-ammonia-<br>modified hydrothermal<br>biochar                                                        | L        | S        | 43.1                    | 7          |
| ZrO <sub>2</sub> nanoparticles<br>embedded in biochar<br>modified with layered<br>double oxides<br>nanosheets | L        | S        | 20.36                   | 8          |
| FCBC                                                                                                          | L        | S        | 53.31                   | This study |

85 F, L, R-P, and S represent Freundlich, Langmuir, Redlich-Peterson, and Pseudo-  
 86 second-order, respectively.

87



**Table S5** Physical and chemical properties of water samples

| Parameters                             | Samples     |             |             |
|----------------------------------------|-------------|-------------|-------------|
|                                        | Ponds       | Farmlands   | Ditches     |
| pH                                     | 8.14±0.064  | 8.79±0.089  | 8.02±0.042  |
| DOC (mg/L)                             | 10.3±0.505  | 11.5±0.156  | 15.8±0.459  |
| TP (mg/L)                              | 0.34±0.004  | 0.53±0.005  | 0.11±0.002  |
| DOP (mg/L)                             | 0.21±0.002  | 0.37±0.003  | 0.084±0.001 |
| TN (mg/L)                              | 0.92±0.014  | 1.13±0.014  | 0.89±0.014  |
| NO <sub>3</sub> <sup>-</sup> -N (mg/L) | 0.150±0.001 | 0.140±0.001 | 0.525±0.002 |
| NO <sub>2</sub> <sup>-</sup> -N (mg/L) | 0.009±0.002 | 0.010±0.001 | 0.072±0.002 |

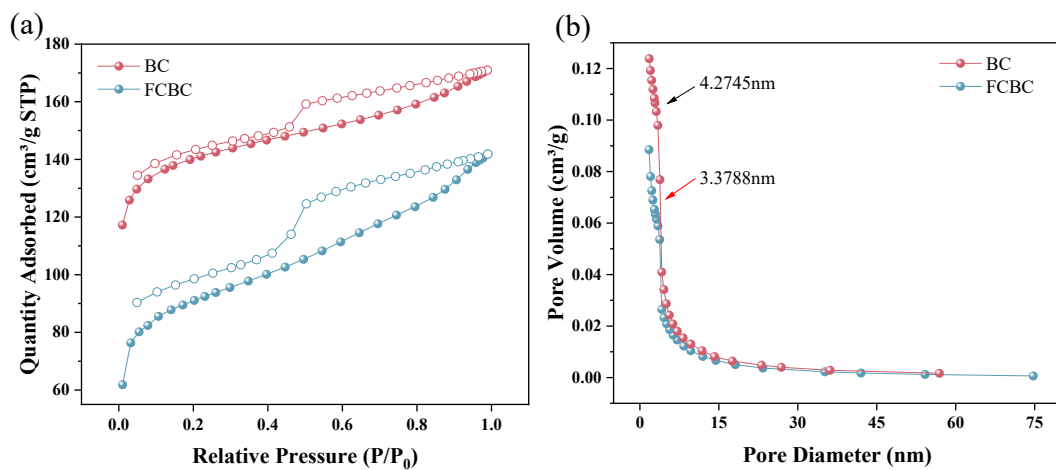

90

91

**Fig. S1** N<sub>2</sub> adsorption-desorption isotherms (a) and pore size distribution (b) of BC and FCBC

92

93

94

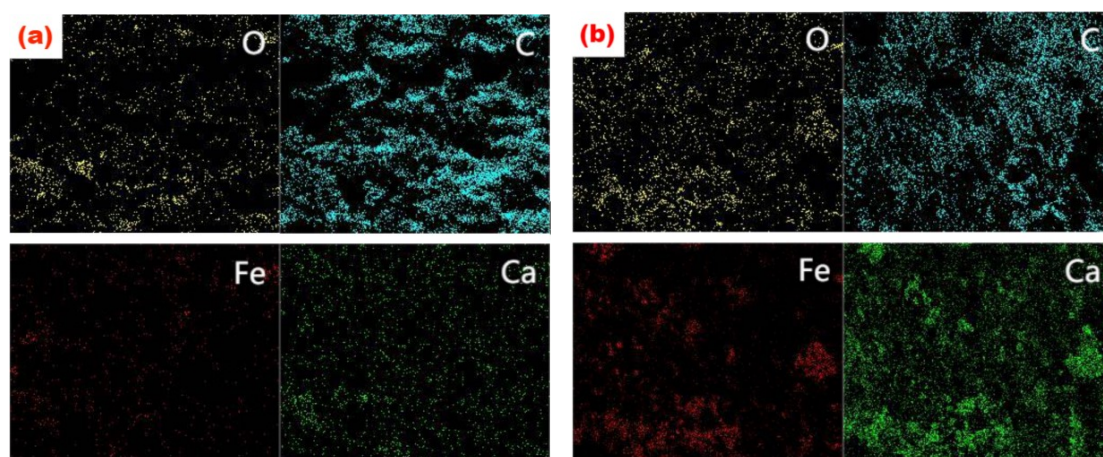

95

96

**Fig. S2** Element mapping of BC(a) and FCBC(b)

97

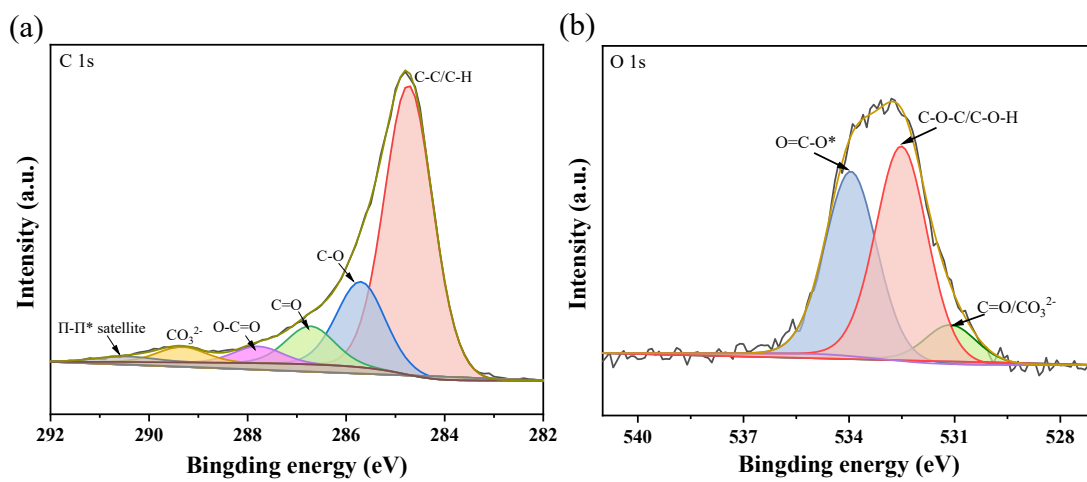

98

99

**Fig. S3** C 1s (a) and O 1s (b) XPS spectra of BC

100

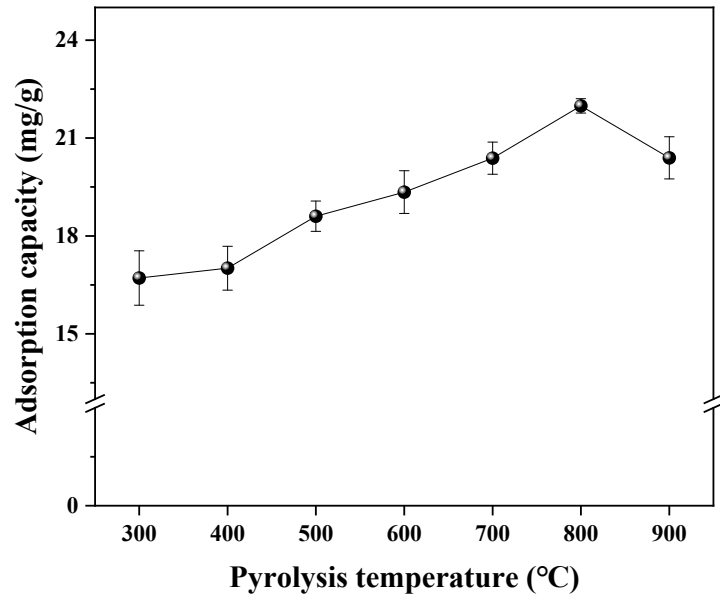

101

102

103

104

105

**Fig. S4** Phosphorus adsorption capacity of FCBC at different pyrolysis temperatures

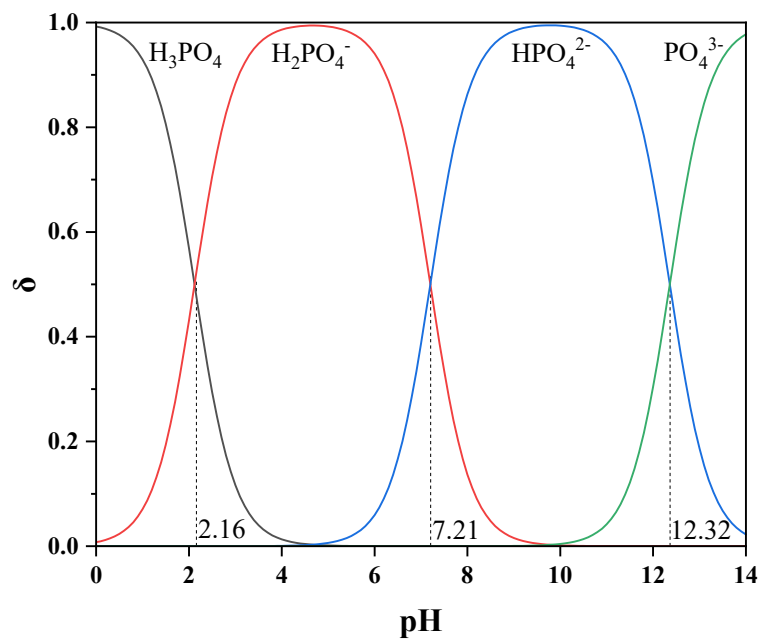

106

107

**Fig. S5** The abundance ratio of phosphates in solutions of varying pH <sup>9</sup>

108

109

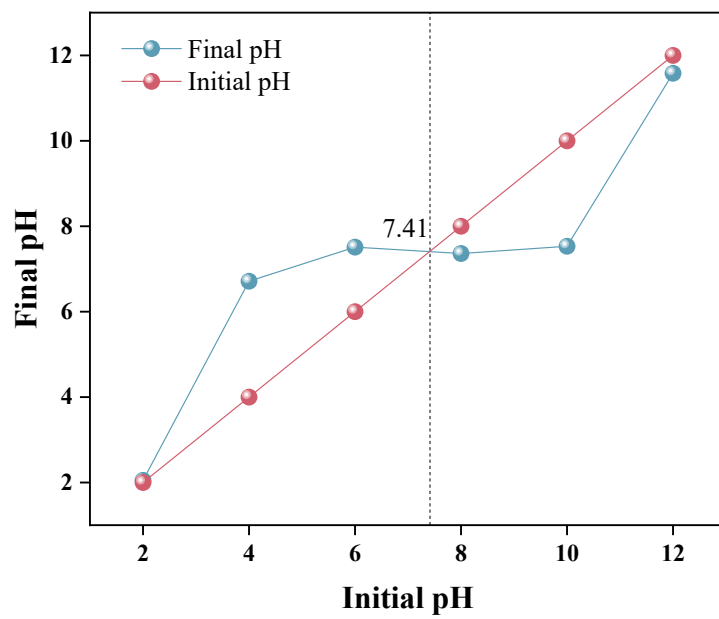

110

111

**Fig. S6** Determination of the point of zero charge of FCBC

112

113

## 114 References

- 115 1 K.W. Jung, T.U. Jeong, H.J. Kang and K.H. Ahn, Characteristics of biochar  
116 derived from marine macroalgae and fabrication of granular biochar by  
117 entrapment in calcium-alginate beads for phosphate removal from aqueous  
118 solution, *Bioresour. Technol.*, 2016, **211**, 108-116,  
119 <https://doi.org/10.1016/j.biortech.2016.03.066>.
- 120 2 L. Wu, C. Wei, S. Zhang, Y. Wang, Y. Kuzyakov and X. Ding, MgO-modified  
121 biochar increases phosphate retention and rice yields in saline-alkaline soil, *J.*  
122 *Cleaner Prod.*, 2019, **235**, 901-909, <https://doi.org/10.1016/j.jclepro.2019.07.043>.
- 123 3 Y.H. Fseha, B. Sizirici and I. Yildiz, The potential of date palm waste biochar for  
124 single and simultaneous removal of ammonium and phosphate from aqueous  
125 solutions, *J. Environ. Chem. Eng.*, 2021, **9**,  
126 <https://doi.org/10.1016/j.jece.2021.106598>.
- 127 4 S. Yang, S. Katuwal, W. Zheng, B. Sharma and R. Cooke, Capture and recover  
128 dissolved phosphorous from aqueous solutions by a designer biochar:  
129 Mechanism and performance insights, *Chemosphere*, 2021, **274**, 129717,  
130 <https://doi.org/10.1016/j.chemosphere.2021.129717>.
- 131 5 X. Fu, P. Wang, J. Wu, P. Zheng, T. Wang, X. Li and M. Ren, Hydrocotyle  
132 vulgaris derived novel biochar beads for phosphorus removal: static and dynamic  
133 adsorption assessment, *J. Environ. Chem. Eng.*, 2022, **10**,  
134 <https://doi.org/10.1016/j.jece.2022.108177>.
- 135 6 X. Tao, T. Huang and B. Lv, Synthesis of Fe/Mg-Biochar Nanocomposites for  
136 Phosphate Removal, *Materials (Basel)*, 2020, **13**,  
137 <https://doi.org/10.3390/ma13040816>.
- 138 7 Z. Shang, Y. Wang, S. Wang, F. Jin and Z. Hu, Enhanced phosphorus removal of  
139 constructed wetland modified with novel Lanthanum-ammonia-modified  
140 hydrothermal biochar: Performance and mechanism, *Chem. Eng. J.*, 2022, **449**,  
141 <https://doi.org/10.1016/j.cej.2022.137818>.
- 142 8 X. Song, X. Chen, W. Chen and T. Ao, ZrO<sub>2</sub> nanoparticles embedded in biochar  
143 modified with layered double oxides nanosheets for phosphorus removal by  
144 capacitive deionization, *Sep. Purif. Technol.*, 2024, **328**,  
145 <https://doi.org/10.1016/j.seppur.2023.125117>.
- 146 9 Q. Yin, H. Ren, R. Wang and Z. Zhao, Evaluation of nitrate and phosphate  
147 adsorption on Al-modified biochar: Influence of Al content, *Sci. Total Environ.*,  
148 2018, **631-632**, 895-903, <https://doi.org/10.1016/j.scitotenv.2018.03.091>.
